# Supplementary material
Source: publisher figshare collection journal article supplement (https://tandf.figshare.com/articles/dataset/_/8299235)
Supplement: Supplementary file 1 [file 2]

Archive with 2 entries (2 files):
- gbif_a_1622004_sm1451.xlsx
- gbif_a_1622004_sm0744.pdf
