# Supplementary material
Source: publisher figshare collection journal article supplement (https://tandf.figshare.com/articles/dataset/_/8299235)
Supplement: Supplementary file 1 [file 2 › gbif_a_1622004_sm1451.xlsx]

## Sheet: Table S1
	Time (days)	Temperature (℃)	Salinity (ppt)	pH	Conductivity (ms)	Total Dissolved Solids (ppt)
	1	21	26.5	8.2	37.5	21
	3	23	39	8.37	53.8	29.4
	5	22	41.3	8.37	55.4	30.2
	7	28	41.7	8.32	56.2	31.1
	14	25	39.6	8.17	53.1	29.9
	21	25	35	8.44	48.6	26.3
	28	22	33.9	8.49	47.8	26.1
